# Supplementary material for: Characterisation and outcomes of ARDS secondary to pneumonia in patients with and without SARS-CoV-2: a single-centre experience
Source: HighWire-hosted journal article supplement (doi:10.1136/bmjresp-2020-000731), 2020-11-01
Supplement: bmjresp-2020-000731supp001_data_supplement.pdf [file bmjresp-2020-000731supp001_data_supplement.pdf]

## Supplemental Information

**Figure S1: CONSORT flowsheet for SARS-CoV-2 ARDS patients**

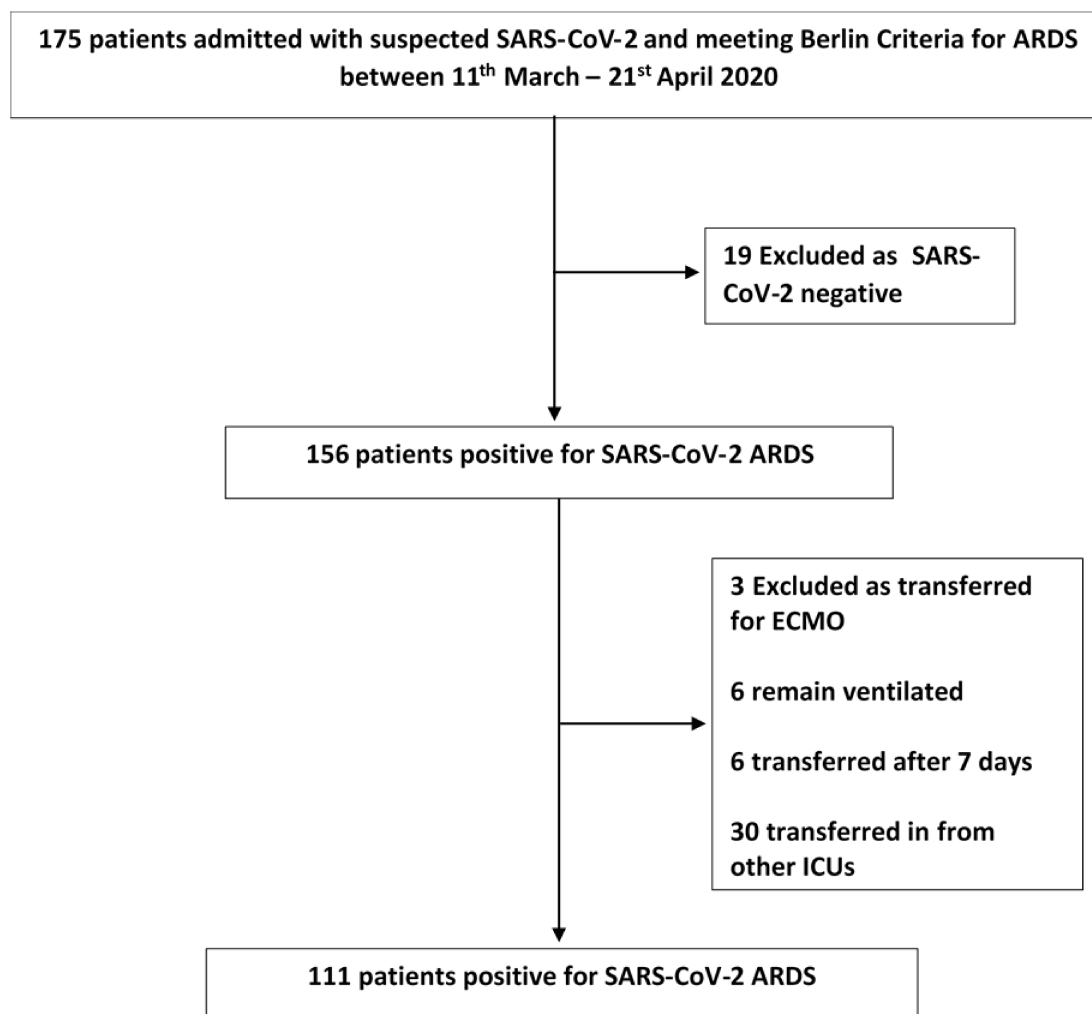

### Abbreviations

ARDS: Acute Respiratory Distress Syndrome. ECMO: Extra-corporeal membrane oxygenation. ICU = Intensive Care Unit. SARS-CoV-2 = Severe Acute Respiratory Syndrome Coronavirus 2.

**Figure S2: CONSORT flowsheet for CAP-ARDS patients**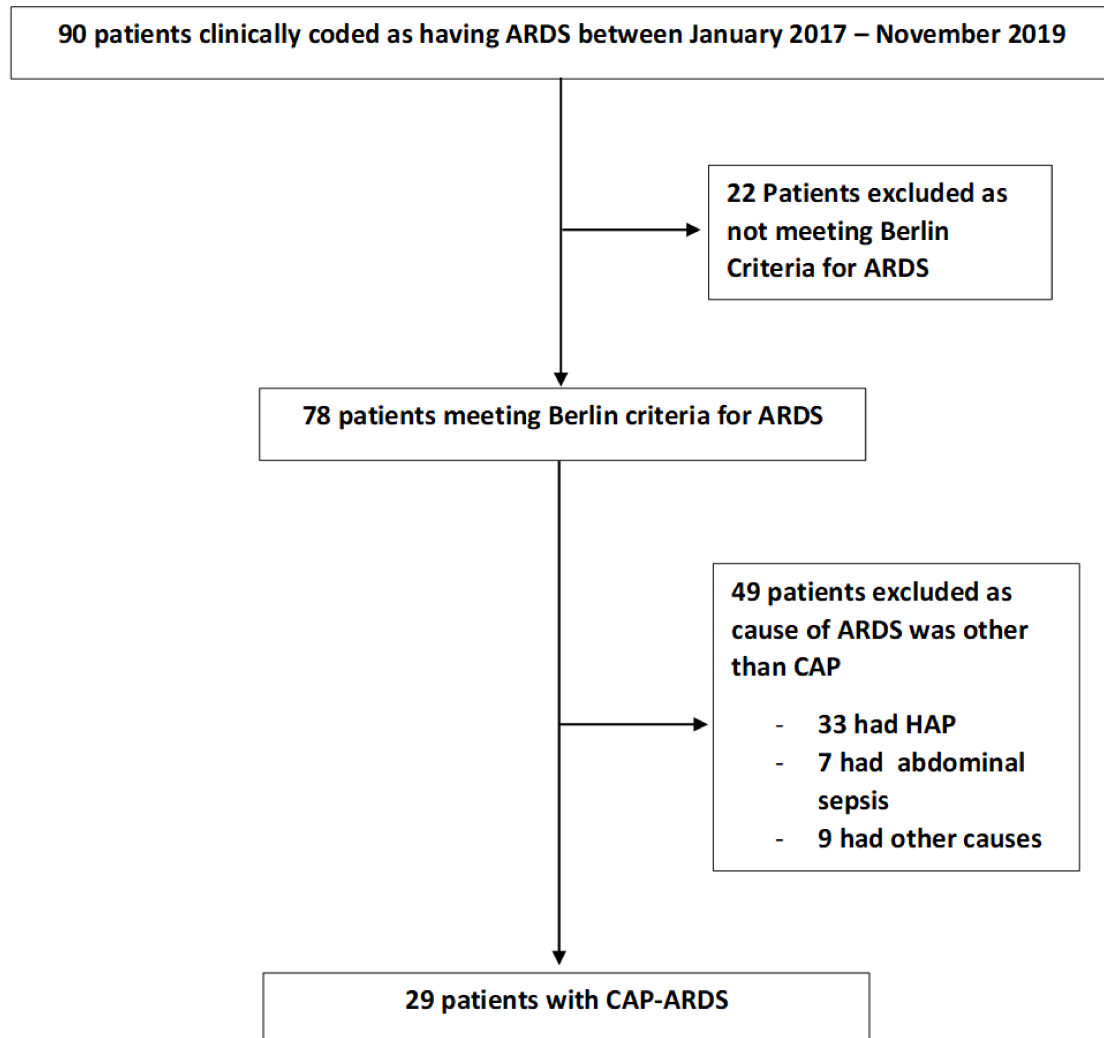

### Abbreviations

ARDS: Acute Respiratory Distress Syndrome. CAP = Community-Acquired Pneumonia. HAP: Hospital-Acquired Pneumonia. ICU = Intensive Care Unit. SARS-CoV-2 = Severe Acute Respiratory Syndrome Coronavirus 2.

**Table S1: Summary of the protocolised management instituted at our hospital**

|                        |                                                                        |                                                                                                                                                                  |
|------------------------|------------------------------------------------------------------------|------------------------------------------------------------------------------------------------------------------------------------------------------------------|
| Ventilation            | Tidal Volume<br>Ppeak/Plateau<br>PaO <sub>2</sub><br>PaCO <sub>2</sub> | 6-8 ml/kg/PBW<br><30 cmH <sub>2</sub> O<br>Target 8-10 kPa<br>Target to keep pH>7.2                                                                              |
| Prone Position         |                                                                        | 18 hours if FiO <sub>2</sub> ≥0.6                                                                                                                                |
| Neuromuscular Blockade |                                                                        | Atracurium infusion                                                                                                                                              |
| Fluid Balance          |                                                                        | Target for neutral balance. Enteral feeds for excluded in fluid balance                                                                                          |
| Antibiotics            |                                                                        | Cessation of routine antibiotics for community acquired pneumonia if SARS-CoV-2 positive                                                                         |
| Sedation               |                                                                        | Morphine and Midazolam                                                                                                                                           |
| First-line vasopressor |                                                                        | Noradrenaline                                                                                                                                                    |
| Thromboprophylaxis     |                                                                        | <50kg Enoxaparin 40mg daily s/c<br>50 - 150kg Enoxaparin 40mg twice daily s/c<br>>150kg Enoxaparin 60mg twice daily s/c<br>GFR < 30 mls / min reduce dose by 50% |

**Abbreviations**

FiO<sub>2</sub> = Fraction of inspired oxygen. GFR = Glomerular filtration rate. S/C = Subcutaneous.  
PaO<sub>2</sub>/CO<sub>2</sub> = Partial pressure of oxygen / carbon dioxide. PWB = Predicted body weight.
